# Supplementary material for: Spatiotemporal hierarchy in antibody recognition against transmitted HIV-1 envelope glycoprotein during natural infection
Source: PubMed Central journal article supplement (PMC4756523; doi:10.1186/s12977-016-0243-3), 2016-02-17
Supplement: 12977_2016_243_MOESM1_ESM.pdf [file 12977_2016_243_MOESM1_ESM.pdf]

**Figure S1** Neutralization resistance of pseudovirus bearing the CNE6 Env to the polyclonal plasma samples from P08 (A) and P11 (B).

**Figure S2** Alignment of a total of 137 full-length envelope sequences from the sequential plasma samples of P08 (A) and P11 (B) over the course of natural infection. Dates of sampling are indicated on the left. Dots represent identical residues, while dashes represent gaps introduced to preserve the alignment. Asterisks indicate the premature stops. Signal peptide, hypervariable (V1, V2, V3, V4, and V5) and conserved (C1, C2, C3, C4, C5) regions, Loop D, CD4-binding loop in gp120, fusion peptide (FP), amino- and carboxy-terminal heptad repeat (NHR and CHR) sequences, immunodominant region (ID), membrane-proximal external region (MPER) and transmembrane domain (TM) in gp41 are highlighted along the sequences.

**Figure S3** Standard ELISA assay to measure the binding of sequential plasma samples from P08 and P11 (A, C) and selected mAbs (B, D) to soluble gp120 captured from the original (P08 and P11) and chimeric viruses (P08/CNE6 and P11/CNE6).

**Figure S4** Infectivity of chimeric viruses (P08/CNE6 and P11/CNE6) compared with the parental ones from P08 (A) and P11 (B) as well as control CNE6.

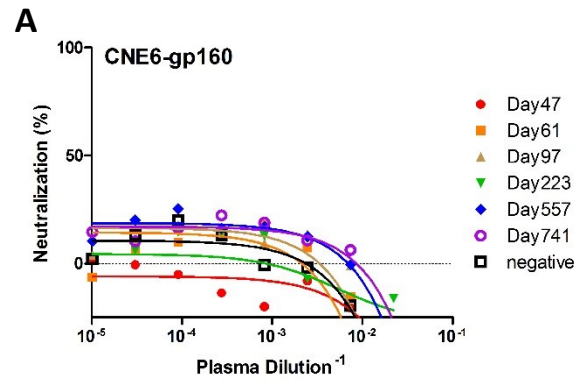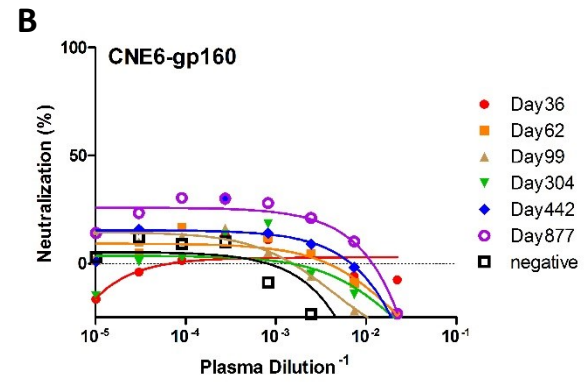

Figure S1

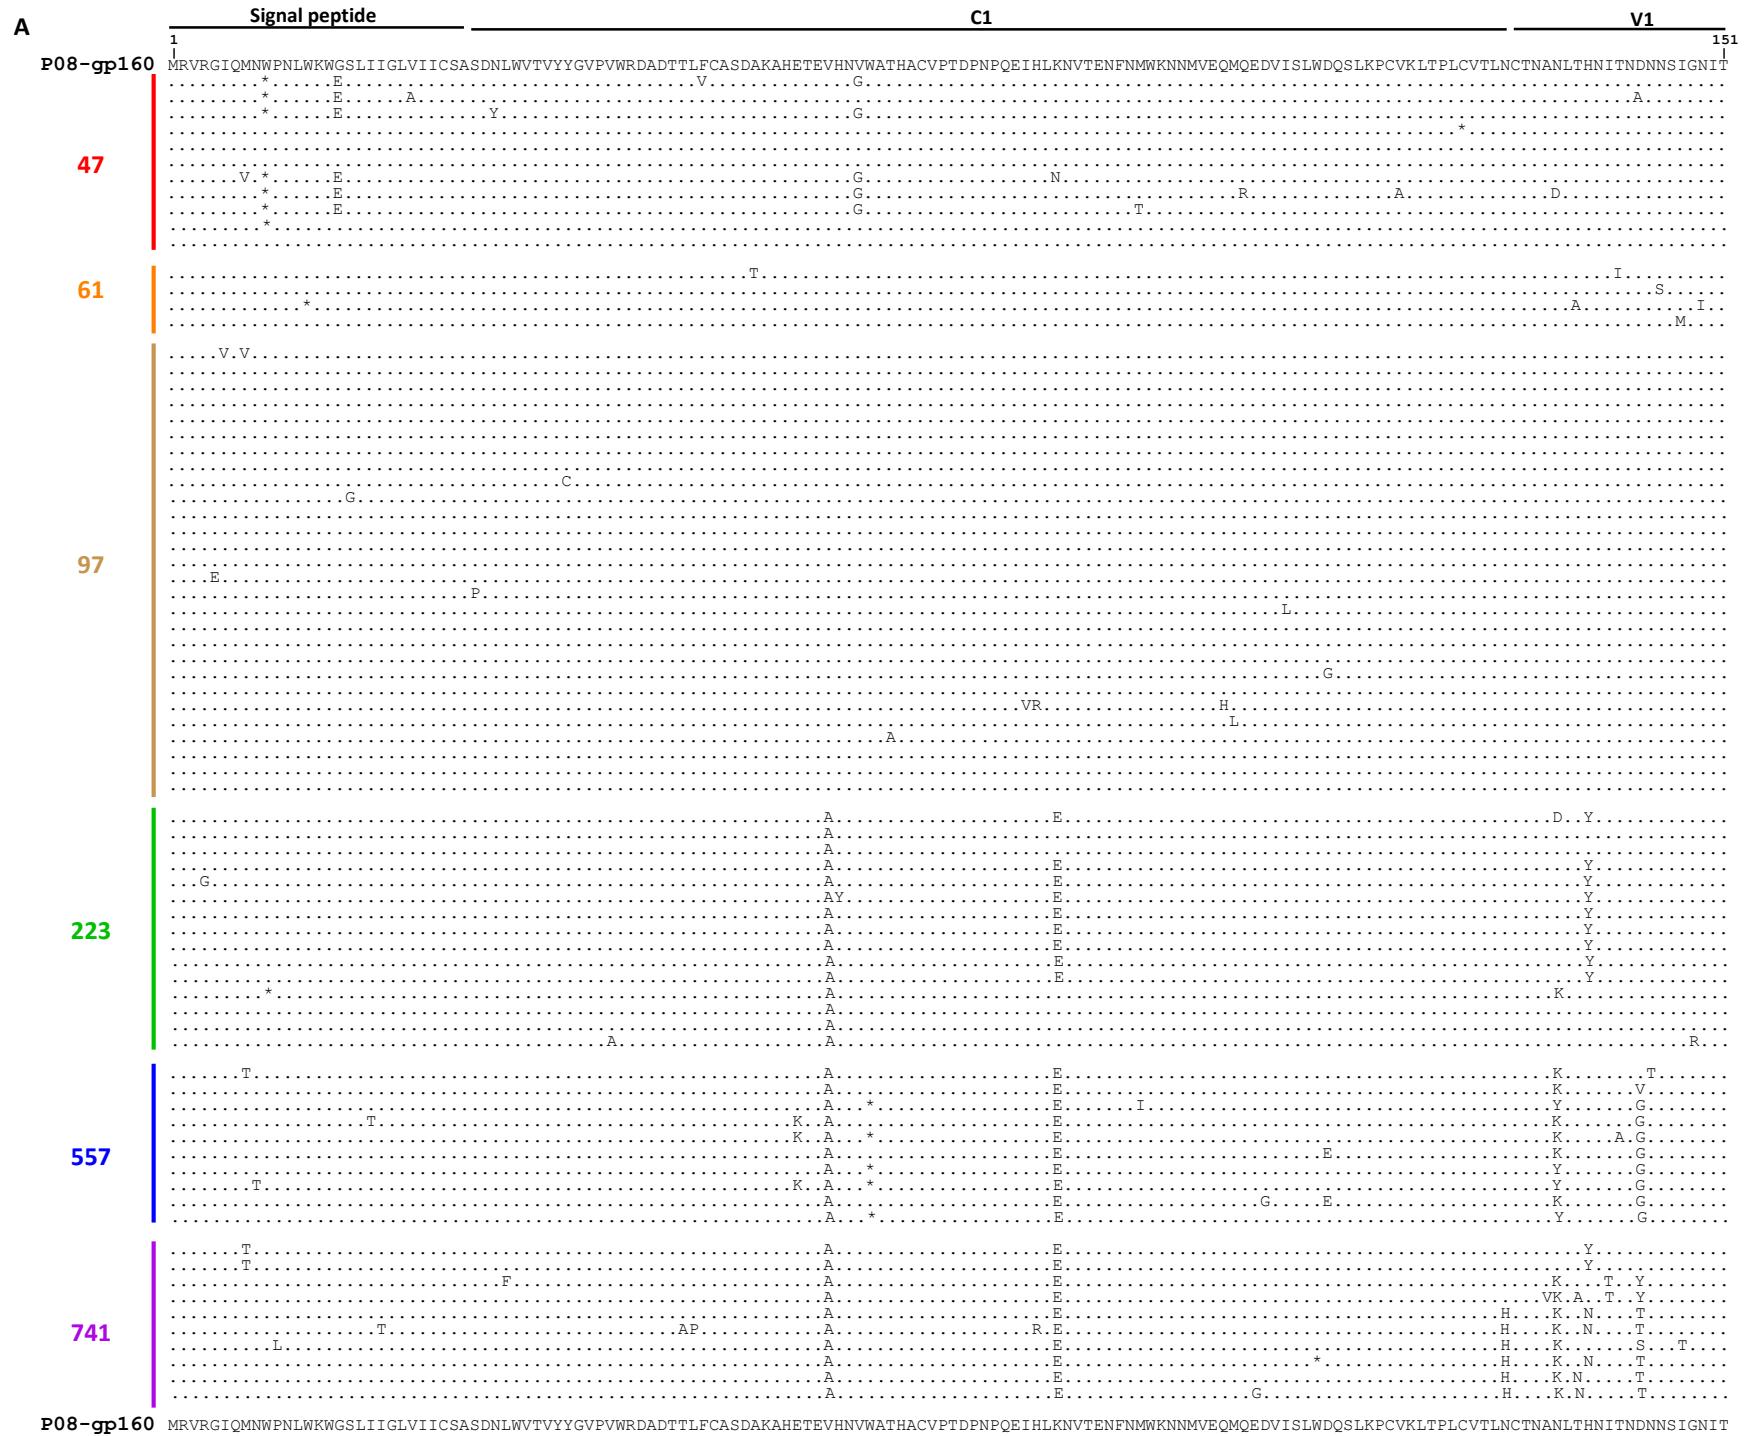

**Figure S2**

P08-gp160 DEVKNCTFNMTEIRGKLGKLVYALFSTLDIVHMGNDSEYRLISCNTSVIKQACPKISFDPIPIHYCAPAGYVILKCNDRKFNKGTGPKKNVSTVQCTHGKIPVSTQLLLNGSLAEEGIIINSENLTNNAKTIIVHLNKSVKINCTRPSN

47 T M L S R  
RE RE E  
P RE D

61 P S

97 S V D  
S E S  
T E  
R

223 P \*  
E E  
E E  
E E  
E E  
E E

557 I V E  
F.D. K.I. KE  
K. K.I. KE  
K. S. K.I. KE  
V F.D. --- E  
F.D. --- E  
I V A E

741 M  
M  
F.D. N  
F.D. E V  
A A I E V  
A A I E  
A P I E  
A A I E  
A A I V  
A A I V E

P08-gp160 DEVKNCTFNMTEIRGKLGKLVYALFSTLDIVHMGNDSEYRLISCNTSVIKQACPKISFDPIPIHYCAPAGYVILKCNDRKFNKGTGPKKNVSTVQCTHGKIPVSTQLLLNGSLAEEGIIINSENLTNNAKTIIVHLNKSVKINCTRPSN



P08-gp160

NATNET--FRPGGGNIKDNWRSELYKYKVVQLEPLGIAPTRARRRVVDREKRAVIGITMIFGFLGAAGSTMGAASITLTVQARQLLSGIVQQQSNLLRAIEAQORMLQLTVWGIKQLQARVLAVERYLKDQRFLLGLWGCSGKIICTTNVP

47

61

97

223

557

741

```

.....*.....P.....
E.E.....E.....A.....
.....V.....T.....K.....*.....
.....K.....K.....G.....*.....
.....L.....A.....
.....C.....G.....
.....A.....N.....
.....E.....EF.....
V.....L.....Q.....A.....A.....I.....
.....K.....K.....K.....K.....P.....
V.....E.....K.....E.....E.....
.....R.....
V...ET.....K.....Q.....A.....R.....
I.....M.....K.....E.....Q.....A.....R.....
I.....K.....E.....K.....E.....
V...ET.....K.....G.....Q.....A.....W.....G.....
V...ET.....K.....Q.....A.....
V...ET.....K.....Q.....A.....G.....
V...ET.....K.....Q.....A.....

```

P08-gp160

NATNET--FRPGGGNIKDNWRSELYKYKVVQLEPLGIAPTRARRRVVDREKRAVIGITMIFGFLGAAGSTMGAASITLTVQARQLLSGIVQQQSNLLRAIEAQORMLQLTVWGIKQLQARVLAVERYLKDQRFLLGLWGCSGKIICTTNVP

CHR MPER TM

610

759

P08-gp160

WNSTWSNKSYYEIIWDMNTWIQWEKEISNYTDQIYSLLETESQNQQEKNKDLLELDKASLWNNWFSITNWLWYIKIFIMIVGGIIGLRIFAVLSIVNRVRQGYSPSLQTPHHPDRPEGIEEGEGEQGRNRSVRLVSGFLALAWDD

47

.....G.....H.....A.....G.....P.....
\* S . \* N . . . . . M . . . . . H . . . . . T . . . . .
.....D.....P.....P.....
\* . \* N . . . . . \* . . . . . \* . . . . . T . . . . .

61

.....R.....A.....H.....G G.....
.....H.....G.....

97

.....H.....R.....D \*.....S.....D.....
.....R.....S.....D.....
.....A.....G.....C.....
.....R N.....
.....R.....R.....R.....R.....

223

.....K.....L.....F Q.....H.....
.....K.....E.....O.....
.....K.....E.....O.....
.....K.....L.....O.....
.....K.....L.....F.....O.....
.....K.....L.....O.....
.....K.....L.....G.....S.....
.....K.....L.....
.....K.....E H.....S.....S.....
.....A.....E.....
.....A.....E.....
.....K.....E.....

557

.....G.....A.....D.....D.....LF.....M.....
.....S.....L D A.....K.....LF.....
.....S.....D A.....N.....LF.....
.....G.....D A.....N.....LF.....K.....
.....G.....D A.....N.....LF.....K.....
.....S.....L D A.....K.....LF.....
.....G.....D A.....N.....LF.....K.....
.....G.....EL G.....N.....LF.....K.....
.....G.....D.....D.....LF.....

741

.....K.....L.....F Q.....
.....DK.....G.....N.....D A.....R.....D.....K.....LF R.....
.....K.....D A.....R.....D.....D.....LF.....
.....E.....D A.....T.....D.....K.....LF.....
.....G.....E.....L D A.....R.....D.....K.....LF.....G.....
.....E.....D.....D.....D.....FF.....
.....G.....L.....D.....D.....F Q.....
.....G.....E.....L D A.....T.....N.....L.....LF.....

P08-gp160

WNSTWSNKSYYEIIWDMNTWIQWEKEISNYTDQIYSLLETESQNQQEKNKDLLELDKASLWNNWFSITNWLWYIKIFIMIVGGIIGLRIFAVLSIVNRVRQGYSPSLQTPHHPDRPEGIEEGEGEQGRNRSVRLVSGFLALAWDD





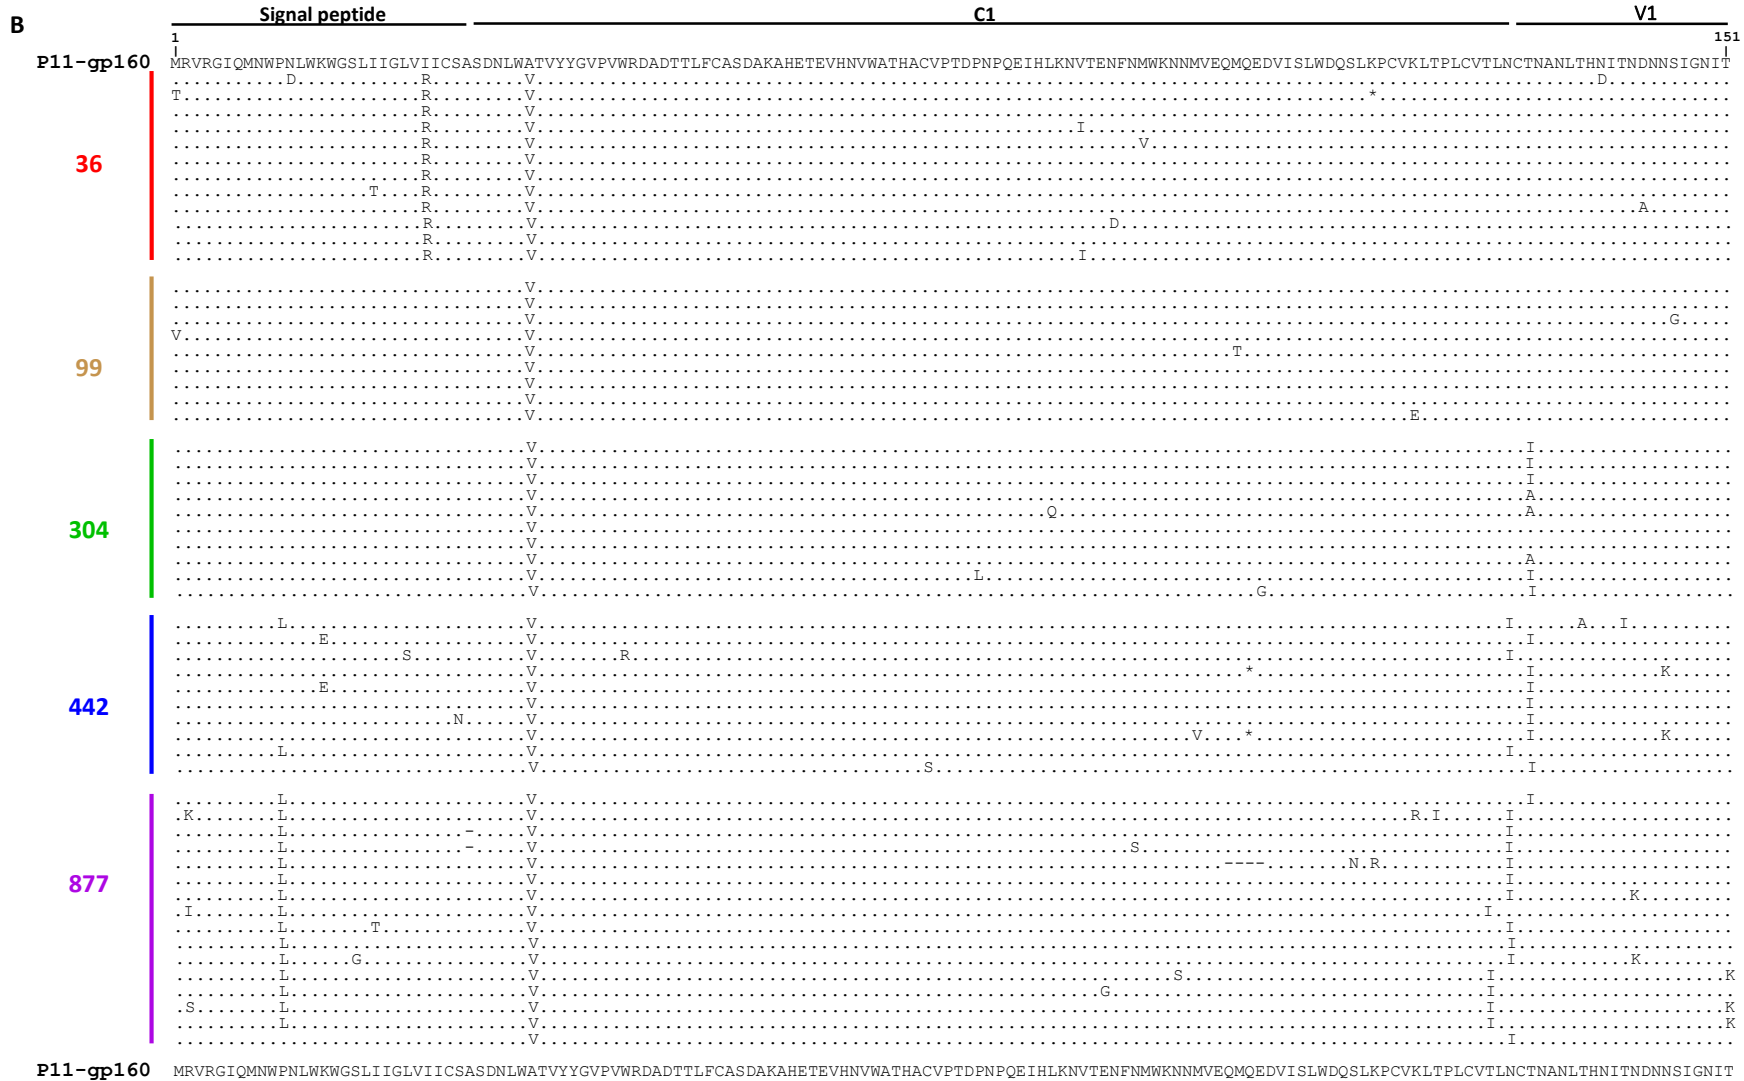

**Figure S2**

|                  | V2                                                                                                                                                                                                                                                                                                                                                                                                                                                                                                    | C2 | Loop D |
|------------------|-------------------------------------------------------------------------------------------------------------------------------------------------------------------------------------------------------------------------------------------------------------------------------------------------------------------------------------------------------------------------------------------------------------------------------------------------------------------------------------------------------|----|--------|
|                  | 152                                                                                                                                                                                                                                                                                                                                                                                                                                                                                                   |    | 301    |
| <b>P11-gp160</b> | DEVKNCIFNMTTEIRGKLQKVYALFSTLDIVHMGNDSEYRLISCNTSVIKQACPKISFDPIPIHYCAPAGYVILKCNDRKFKNGTGPCKNVSTVQCTHGIRKPVVSTQLLNGSLAEEGIIISSENLTNNAKTIIVHLNKSVKINCTRPSN                                                                                                                                                                                                                                                                                                                                                |    |        |
| <b>36</b>        | .....P.....<br>.....R.....Y.....<br>.....S.....G.....S.....<br>.....R.....Y.....                                                                                                                                                                                                                                                                                                                                                                                                                      |    |        |
| <b>99</b>        | .....A.....I.....<br>.....D.....A.....<br>.....VR.....                                                                                                                                                                                                                                                                                                                                                                                                                                                |    |        |
| <b>304</b>       | .....R.....L.....*.....A.....R.....<br>.....D.....A.....<br>.....D.....A.....<br>.....D.....D.....I.....D.....<br>.....D.....R.....S.....                                                                                                                                                                                                                                                                                                                                                             |    |        |
| <b>442</b>       | .....M.....N.....F.....<br>.....A.....R.....E.....R.....<br>.....C.....R.....A.....<br>.....A.....I.....<br>.....R.....                                                                                                                                                                                                                                                                                                                                                                               |    |        |
| <b>877</b>       | .....R.....I.....*.....G.....D.....M.....F.....<br>.....M.....R.....I.....D.....F.....<br>.....K.....R.....P.....ID.....F.....<br>.....R.....R.....I.....D.....F.....<br>.....Q.....R.....R.....V.....R.....<br>.....S.....D.....F.....<br>.....L.....D.....F.....<br>.....L.....D.....F.....<br>.....Q.....V.....---.....D.....F.....<br>.....S.....T.....D.....F.....<br>.....S.....D.....F.....<br>.....S.....A.....D.....F.....<br>.....S.....D.....F.....<br>.....S.....G.....I.....D.....F..... |    |        |
| <b>P11-gp160</b> | DEVKNCIFNMTTEIRGKLQKVYALFSTLDIVHMGNDSEYRLISCNTSVIKQACPKISFDPIPIHYCAPAGYVILKCNDRKFKNGTGPCKNVSTVQCTHGIRKPVVSTQLLNGSLAEEGIIISSENLTNNAKTIIVHLNKSVKINCTRPSN                                                                                                                                                                                                                                                                                                                                                |    |        |

|                  | V3                                                                                                                                               | C3<br>CD4 binding loop | V4 | C4  |
|------------------|--------------------------------------------------------------------------------------------------------------------------------------------------|------------------------|----|-----|
|                  | 302                                                                                                                                              |                        |    | 459 |
| <b>P11-gp160</b> | NTRTSIRIGPGQMFYRTGDIIGDIRKAYCEINGTEWNETLNQVTEKLLKHFNKTIIFQPPSGGDLETTTHHFNCRGEFFYCNTTKLFNSKELNAT-----IILPCRIKQIVNMWQGVGQAMYPISGIINCSINITGILLTRDGG |                        |    |     |
| <b>36</b>        | .                                                                                                                                                | .                      | .  | .   |
|                  | .                                                                                                                                                | .                      | .  | .   |
|                  | .                                                                                                                                                | .                      | .  | .   |
|                  | .                                                                                                                                                | .                      | .  | .   |
|                  | .                                                                                                                                                | .                      | .  | .   |
|                  | .                                                                                                                                                | .                      | .  | .   |
|                  | .                                                                                                                                                | .                      | .  | .   |
|                  | .                                                                                                                                                | .                      | .  | .   |
|                  | .                                                                                                                                                | .                      | .  | .   |
|                  | .                                                                                                                                                | .                      | .  | .   |
| <b>99</b>        | .                                                                                                                                                | .                      | .  | .   |
|                  | .                                                                                                                                                | .                      | .  | .   |
|                  | .                                                                                                                                                | .                      | .  | .   |
|                  | .                                                                                                                                                | .                      | .  | .   |
|                  | .                                                                                                                                                | .                      | .  | .   |
|                  | .                                                                                                                                                | .                      | .  | .   |
|                  | .                                                                                                                                                | .                      | .  | .   |
|                  | .                                                                                                                                                | .                      | .  | .   |
|                  | .                                                                                                                                                | .                      | .  | .   |
|                  | .                                                                                                                                                | .                      | .  | .   |
| <b>304</b>       | .                                                                                                                                                | .                      | .  | .   |
|                  | .                                                                                                                                                | .                      | .  | .   |
|                  | .                                                                                                                                                | .                      | .  | .   |
|                  | .                                                                                                                                                | .                      | .  | .   |
|                  | .                                                                                                                                                | .                      | .  | .   |
|                  | .                                                                                                                                                | .                      | .  | .   |
|                  | .                                                                                                                                                | .                      | .  | .   |
|                  | .                                                                                                                                                | .                      | .  | .   |
|                  | .                                                                                                                                                | .                      | .  | .   |
|                  | .                                                                                                                                                | .                      | .  | .   |
| <b>442</b>       | .                                                                                                                                                | .                      | .  | .   |
|                  | .                                                                                                                                                | .                      | .  | .   |
|                  | .                                                                                                                                                | .                      | .  | .   |
|                  | .                                                                                                                                                | .                      | .  | .   |
|                  | .                                                                                                                                                | .                      | .  | .   |
|                  | .                                                                                                                                                | .                      | .  | .   |
|                  | .                                                                                                                                                | .                      | .  | .   |
|                  | .                                                                                                                                                | .                      | .  | .   |
|                  | .                                                                                                                                                | .                      | .  | .   |
|                  | .                                                                                                                                                | .                      | .  | .   |
| <b>877</b>       | .                                                                                                                                                | .                      | .  | .   |
|                  | .                                                                                                                                                | .                      | .  | .   |
|                  | .                                                                                                                                                | .                      | .  | .   |
|                  | .                                                                                                                                                | .                      | .  | .   |
|                  | .                                                                                                                                                | .                      | .  | .   |
|                  | .                                                                                                                                                | .                      | .  | .   |
|                  | .                                                                                                                                                | .                      | .  | .   |
|                  | .                                                                                                                                                | .                      | .  | .   |
|                  | .                                                                                                                                                | .                      | .  | .   |
|                  | .                                                                                                                                                | .                      | .  | .   |
| <b>P11-gp160</b> | NTRTSIRIGPGQMFYRTGDIIGDIRKAYCEINGTEWNETLNQVTEKLLKHFNKTIIFQPPSGGDLETTTHHFNCRGEFFYCNTTKLFNSKELNAT-----IILPCRIKQIVNMWQGVGQAMYPISGIINCSINITGILLTRDGG |                        |    |     |

**P11-gp160** ISNATNET--FRPGGNIKDNWRSELYKYKVVQLEPLGIAPTRARRRVVDREKRAVGIGTMIFGFLGAAGSTMGAASITLTVQARQLLSGIVQQSNLLRAIEAQQRMLQLTVWGIKQLQARVLAVERYLKDQRFGLWGCSGKIICTTN

**36** .....T.....T.....R.....M.....N.....V.....A.....

**99** .....\*.....E.R.I.....S.....V.....E.R.I.....E.R.I.....A.....E.R.I.....S.....A.....E.R.I.....E.R.I.....E.R.I.....E.R.I.....E.R.I.....E.R.I.....E.R.I.....

**304** .....A.....K.....S.....A.....P.....C.....M.....\*.....

**442** .....I.....A.....A.....S.....K.....A.....A.....A.....A.....A.....L.....T.....S.....A.....A.....A.....

**877** .....V.D.....S.....I.....I.....A.....E.....V.D.....G.....I.....I.....A.....A.....A.....A.....P.....A.....K.....V.D.....A.....A.....A.....A.....A.....I.....I.....I.....I.....A.....Y.....AET.....I.....A.....A.....ET.....I.....A.....P.....A.....V.....ET.....I.....N.....A.....ET.....E.....I.....A.....ET.....I.....A.....

**P11-gp160** ISNATNET--FRPGGNIKDNWRSELYKYKVVQLEPLGIAPTRARRRVVDREKRAVGIGTMIFGFLGAAGSTMGAASITLTVQARQLLSGIVQQSNLLRAIEAQQRMLQLTVWGIKQLQARVLAVERYLKDQRFGLWGCSGKIICTTN



P11-gp160

DDLRSCLCFSYRRLRDFILIATRVELLGGKLRGWEGLKYLGNLLYWGQELKTSAISLLNAIAITTAEWTDREVIEVAQLAWRALLHIPRRIRQGFERALL

36

```

.....*.....
.....G.....L.....
.....*.....

```

99

```

.....T.....D.....
.....T.G.....P.....D.....
.....T.R.....R.....D.....
.....T.....R.....D.....
.....T.....D.....
.....T.....D.....
.....R.....D.....

```

304

```

.....L.....
.....S.....
.....T.....P.....
.....G.....

```

442

```

.....G.....

```

877

```

.....R.....R.....
.....N.....F.....
.....K.....F.....
.....N.T.....F.....
.....R.....R.....F.....
.....P.....

```

P11-gp160

DDLRSCLCFSYRRLRDFILIATRVELLGGKLRGWEGLKYLGNLLYWGQELKTSAISLLNAIAITTAEWTDREVIEVAQLAWRALLHIPRRIRQGFERALL

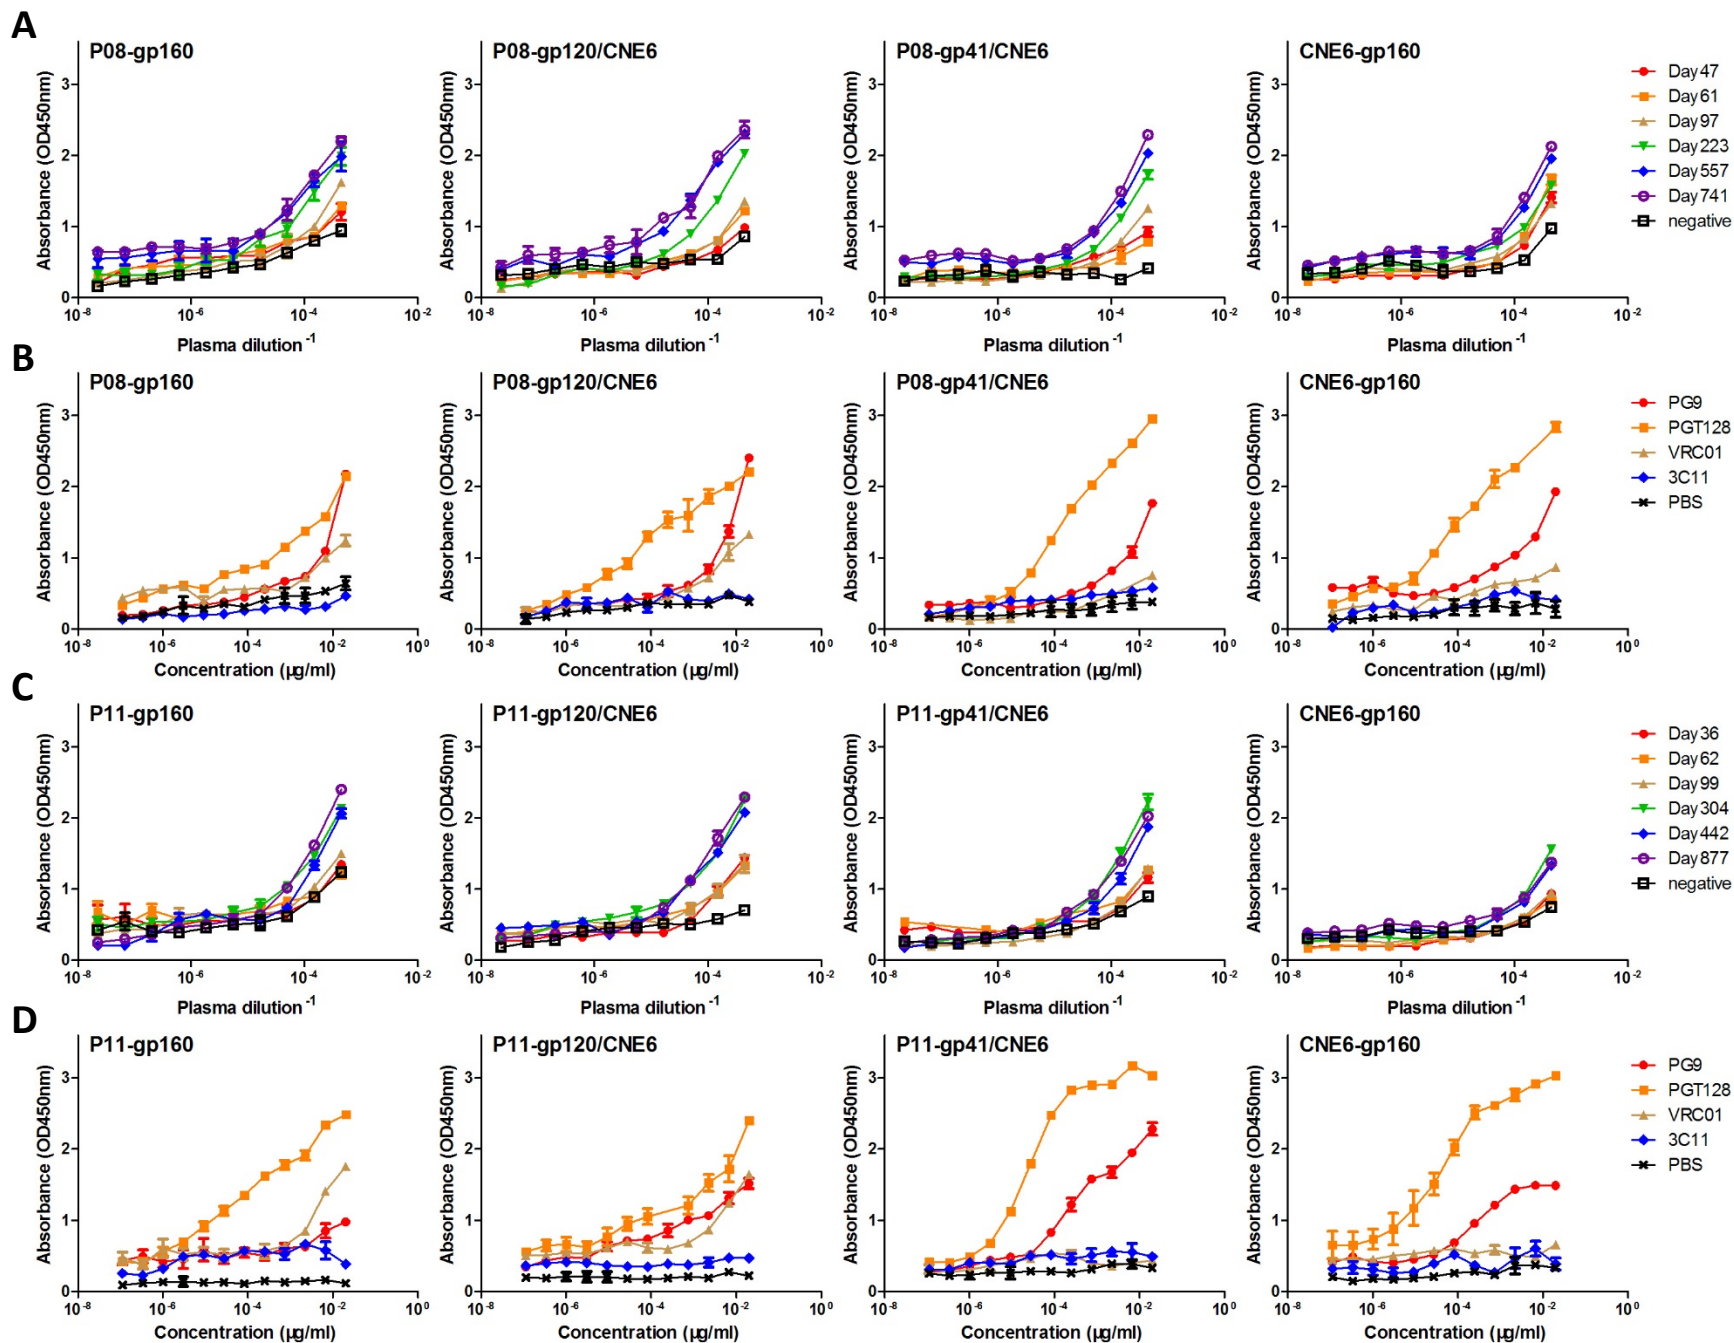

Figure S3

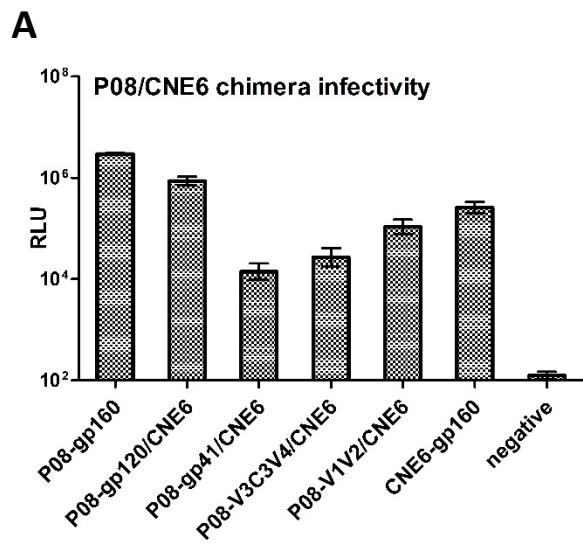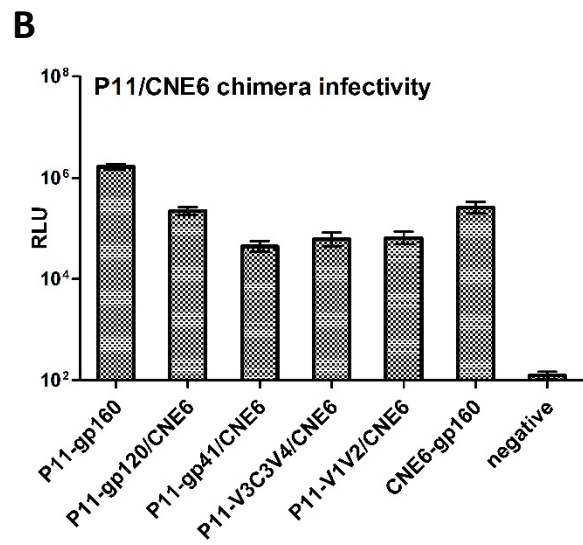

**Figure S4**
